# Supplementary material
Source: Springer Nature journal article supplement (https://www.springerprofessional.de/resource/supplementary/13638_2011_84_MOESM10_ESM.pdf/11897426)

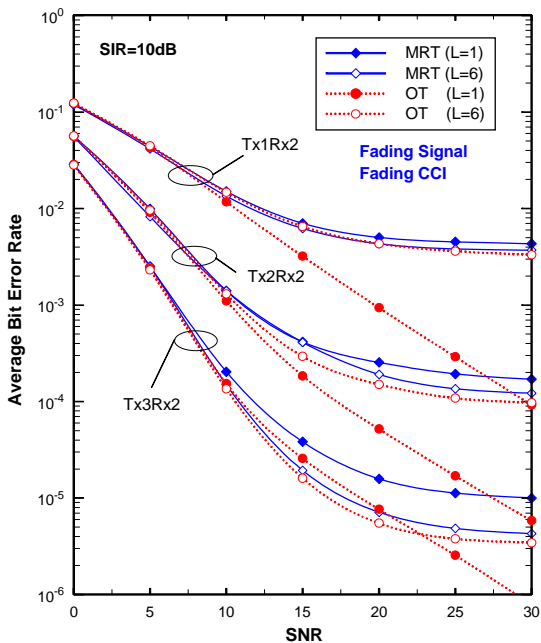

Supplement: MOESM10 [file 11897426]
